# Supplementary material for: Colorimetric detection of hydrogen peroxide and glucose by exploiting the peroxidase-like activity of papain
Source: PubMed Central journal article supplement — RSC Adv. 2019 May 28;9(29):16566–70. doi: 10.1039/c9ra03111a (PMC9064409; doi:10.1039/c9ra03111a), 2019-05-28
Supplement: RA-009-C9RA03111A-s001.pdf [file RA-009-C9RA03111A-s001.pdf]

**Supplementary information**

**Colorimetric detection of hydrogen peroxide and glucose by  
exploiting the peroxidase-like activity of papain**

Yuye Chen <sup>a</sup>, Qingmei Zhong <sup>a</sup>, Yilin Wang<sup>\*a, b</sup>, Chunling Yuan <sup>a</sup>, Xiu Qin <sup>a</sup>, and Yuanjin Xu <sup>a</sup>

(<sup>a</sup> School of Chemistry and Chemical Engineering, Guangxi University, Guangxi Key Laboratory of Biorefinery, Nanning 530004, China

<sup>b</sup> Guangxi Key Laboratory for Agro-Environment and Agro-Product Safety, Nanning 530004, China)

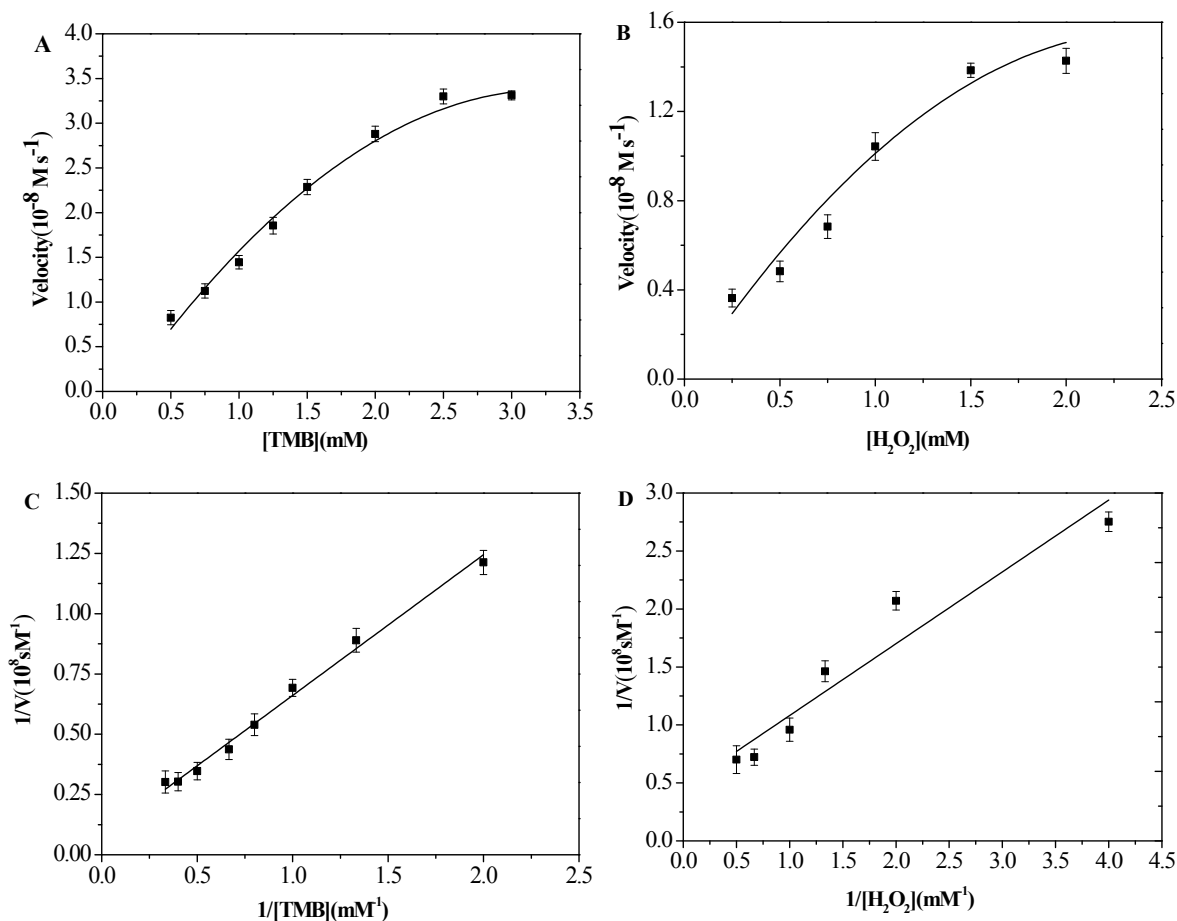

**Fig. S1.** Steady-state kinetic assays of papain using Michaelis–Menten model, (A) at a constant concentration of  $\text{H}_2\text{O}_2$  [5.0 mM] while TMB concentration was varied from 0.5 to 3.0 mM and (B) at a constant concentration of TMB [1.0 mM] while  $\text{H}_2\text{O}_2$  concentration was varied from 0.25 to 2.0 mM. (C) Double-reciprocal plots of initial velocity versus TMB concentration and (D) Double-reciprocal plots of initial velocity versus  $\text{H}_2\text{O}_2$  concentration.

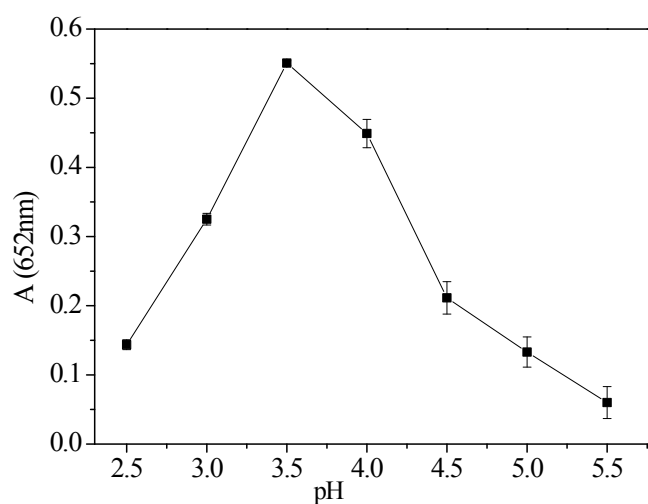

**Fig. S2.** Effect of pH on the absorbance of the reaction system. (other conditions: 100  $\mu\text{L}$  of 100  $\mu\text{g}/\text{mL}$  papain; 1.0 mL of 5.0 mM TMB; 1.0 mL of 50 $\mu\text{M}$   $\text{H}_2\text{O}_2$ ; reaction temperature is 40°C; reaction time is 20 min.)

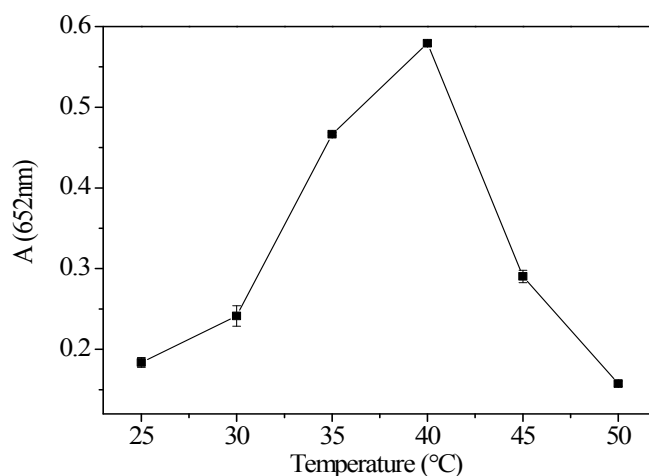

**Fig. S3.** Effect of temperature on the absorbance of the reaction system. (other conditions: 100  $\mu$ L of 100  $\mu$ g/mL papain; 1.0 mL of 5.0 mM TMB; 1.0 mL of 50  $\mu$ M  $H_2O_2$ ; pH=3.5; reaction time is 20 min.)

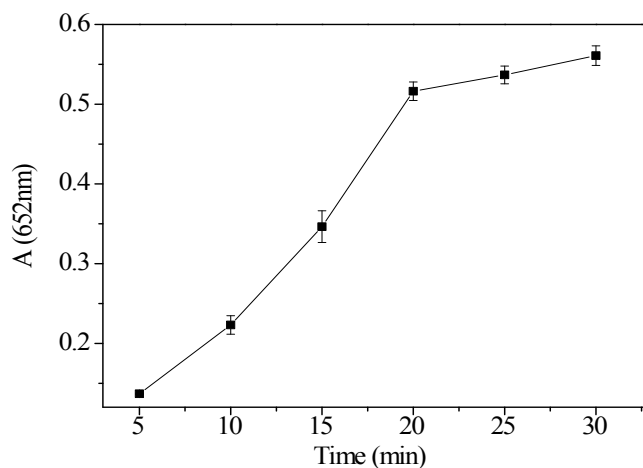

**Fig. S4.** Effect of reaction time on the absorbance of the reaction system. (other conditions: 100  $\mu$ L of 100  $\mu$ g/mL papain; 1.0 mL of 5.0 mM TMB; 1.0 mL of 50  $\mu$ M  $H_2O_2$ ; pH=3.5; reaction temperature is 40°C.)

**Table S1.** Comparison of kinetic parameters between papain and other catalysts

| Catalysts | [E] (M)                | $K_m$ (mM) |          | $V_{max}$ ( $10^{-8}M \cdot s^{-1}$ ) |          | $K_{cat}$ ( $s^{-1}$ ) |                    | Reference |
|-----------|------------------------|------------|----------|---------------------------------------|----------|------------------------|--------------------|-----------|
|           |                        | TMB        | $H_2O_2$ | TMB                                   | $H_2O_2$ | TMB                    | $H_2O_2$           |           |
| HRP       | $2.27 \times 10^{-11}$ | 0.15       | 0.61     | 4.53                                  | 2.53     | $2.00 \times 10^3$     | $1.04 \times 10^3$ | [37]      |
| Ficin     | $4.20 \times 10^{-8}$  | 0.19       | 0.35     | 4.69                                  | 3.42     | 1.12                   | 0.81               | [37]      |
| Papain    | $4.27 \times 10^{-8}$  | 6.94       | 1.29     | 12.03                                 | 2.11     | 2.82                   | 0.49               | This work |

[E] is the enzyme concentration,  $K_m$  is the Michaelis constant,  $V_{max}$  is the maximum reaction rate,  $K_{cat}$  is the catalytic constant, where  $K_{cat} = V_{max}/[E]$
